# Supplementary material for: Endotaxial growth of FexGe single-crystals on Ge(001) substrates
Source: Royal Society of Chemistry journal article supplement (doi:10.1039/c8ce00211h), 2018-01-01
Supplement: c8ce00211h1.pdf [file c8ce00211h1.pdf]

## Supplementary Information

### Endotaxial Growth of $\text{Fe}_x\text{Ge}$ Single-Crystals on Ge(001) Substrates

*Wen-Ya Wu,<sup>1</sup> Weng Weei Tjiu,<sup>1</sup> Wei Wan,<sup>2</sup> Hui Ru Tan,<sup>1</sup> Siew Lang Teo,<sup>1</sup> Shi Feng Guo,<sup>1</sup> and Sze Ter Lim<sup>3</sup>, Ming Lin<sup>\*1</sup>*

1. Institute of Materials Research and Engineering, Agency for Science, Technology and Research (A\*STAR), 2 Fusionopolis Way, Innovis, #08-03, Singapore 138634

2. Department of Material and Environmental Chemistry, Stockholm University, SE-106 91, Stockholm, Sweden

3. Data Storage Institute, Agency for Science, Technology and Research (A\*STAR), 2 Fusionopolis Way, #08-01 Innovis, Singapore 138634

### Additional experiments and discussions

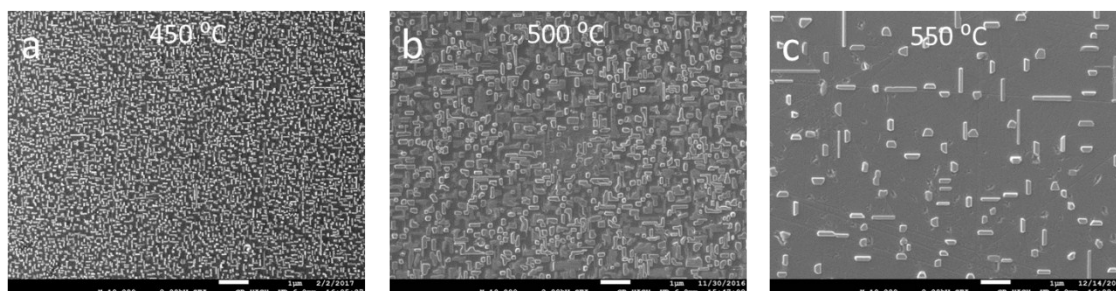

**Figure S1.** SEM images of deposited  $\text{Fe}_x\text{Ge}$  islands on Ge (001) substrate at various temperatures.

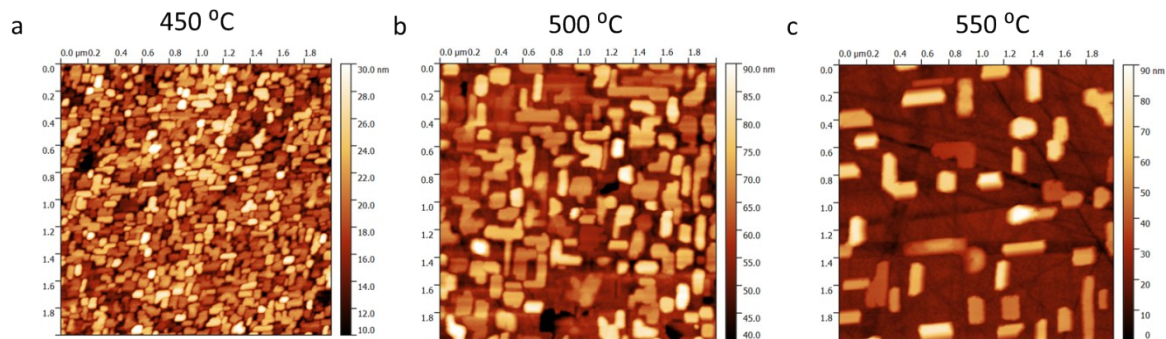

**Figure S2.** AFM of deposited  $\text{Fe}_x\text{Ge}$  islands on Ge (001) substrate at various temperatures.

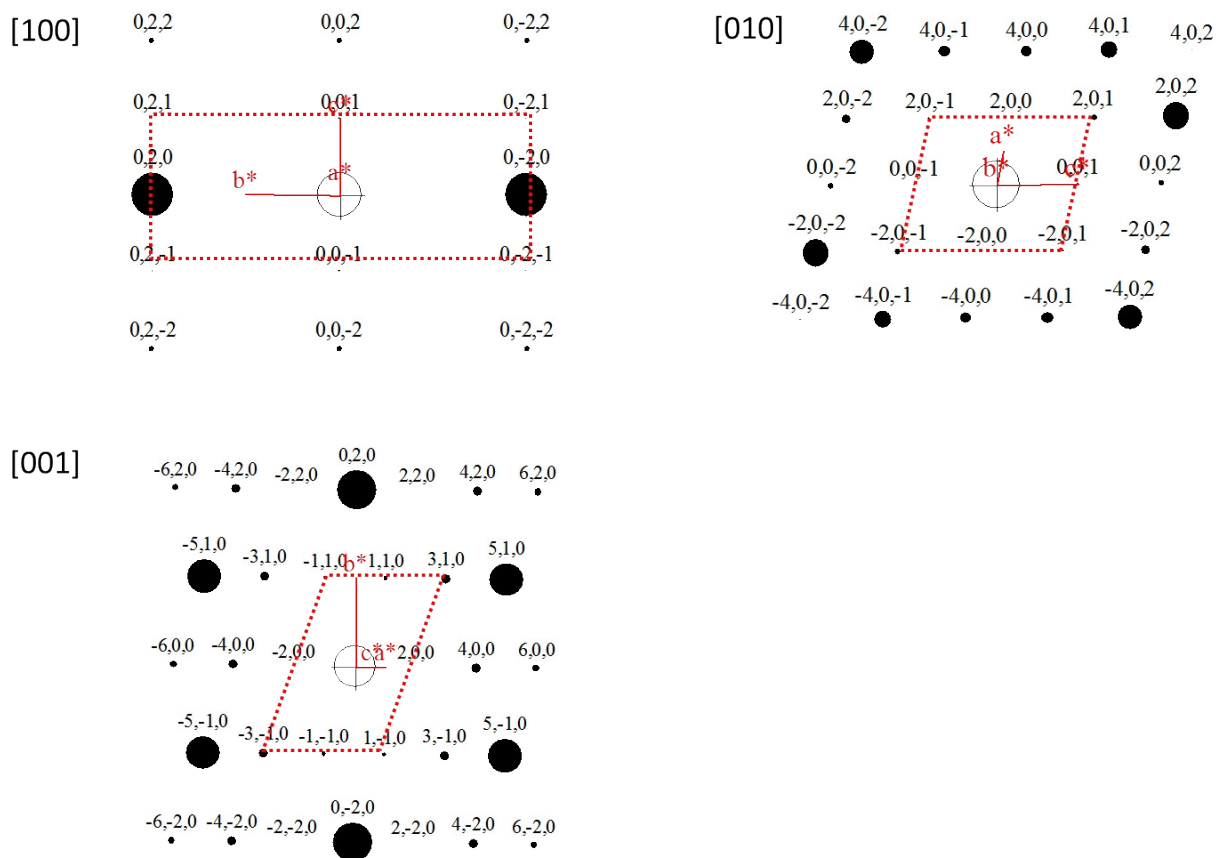

**Figure S3.** Simulated diffraction pattern from three zone axes of monoclinic  $\text{FeGe}$ .

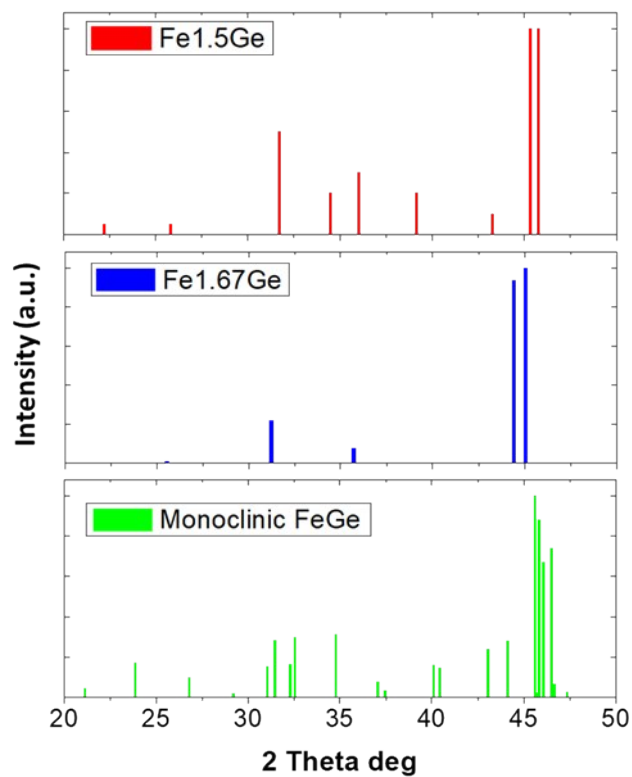

**Figure S4.** Standard XRD pattern of Fe<sub>1.5</sub>Ge, Fe<sub>1.67</sub>Ge and FeGe.

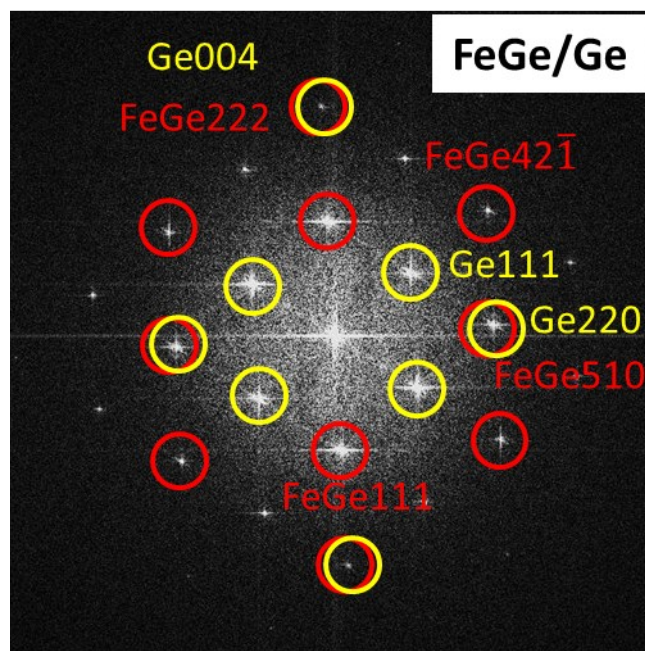

**Figure S5.** FFT of the monoclinic FeGe / Ge interface generated from HRTEM in Figure 3(a).

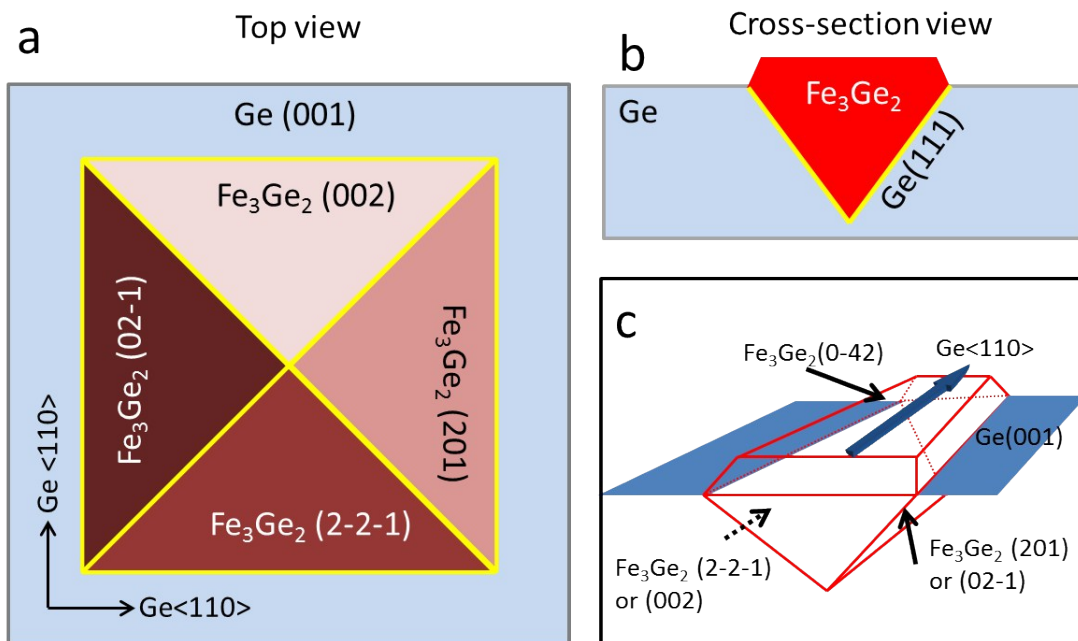

**Figure S6.** Schematic drawing of growth orientation of  $\text{Fe}_3\text{Ge}_2$  island on Ge (001) substrate. (a) Top view of the substrate showing two major growth directions of  $\text{Fe}_{13}\text{Ge}_8$  island, along Ge  $\langle 110 \rangle$ , perpendicular to each other. The four interface facets of  $\text{Fe}_3\text{Ge}_2$  are (002), (201), (2-2-1) and (02-1) respectively; (b) side view of the FeGe island after FIB cut, displaying the interface relationship between  $\text{Fe}_3\text{Ge}_2$  and Ge (111); (c) 3D illustration of the island and substrate endotaxial relationship.

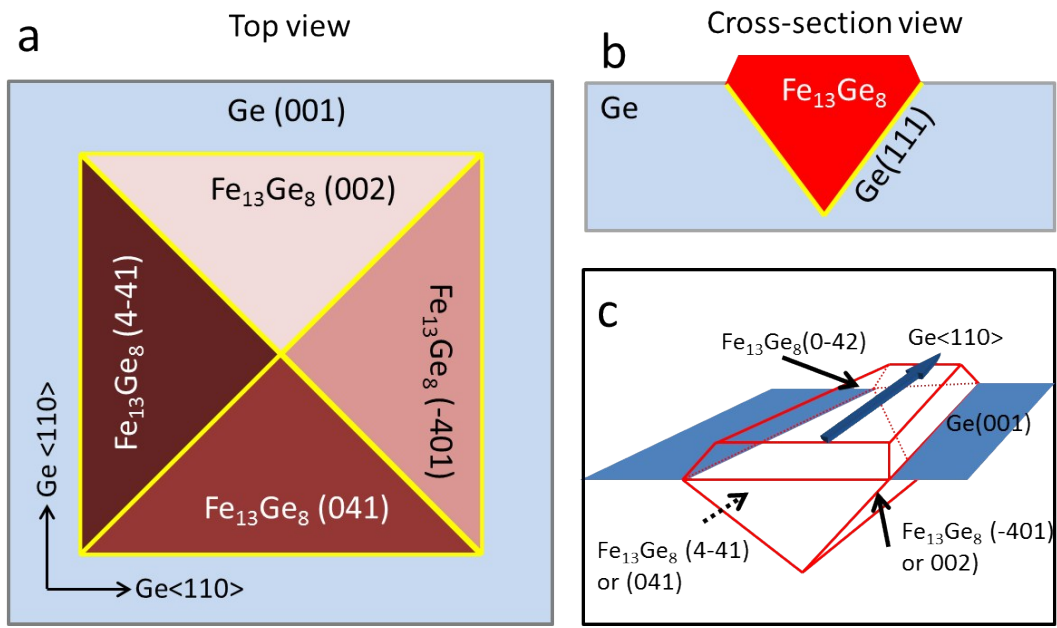

**Figure S7.** Schematic drawing of growth orientation of Fe<sub>13</sub>Ge<sub>8</sub> island on Ge (001) substrate. (a) Top view of the substrate showing two major growth directions of Fe<sub>13</sub>Ge<sub>8</sub> island, along Ge <110>, perpendicular to each other. Red top facet is Fe<sub>13</sub>Ge<sub>8</sub> (0-42), the four interface facets of Fe<sub>13</sub>Ge<sub>8</sub> are (4-41), (002), (-401) and (041) respectively; (b) side view of the FeGe island after FIB cut, displaying the interface relationship between Fe<sub>13</sub>Ge<sub>8</sub> and Ge (111); (c) 3D illustration of the island and substrate endotaxial relationship.

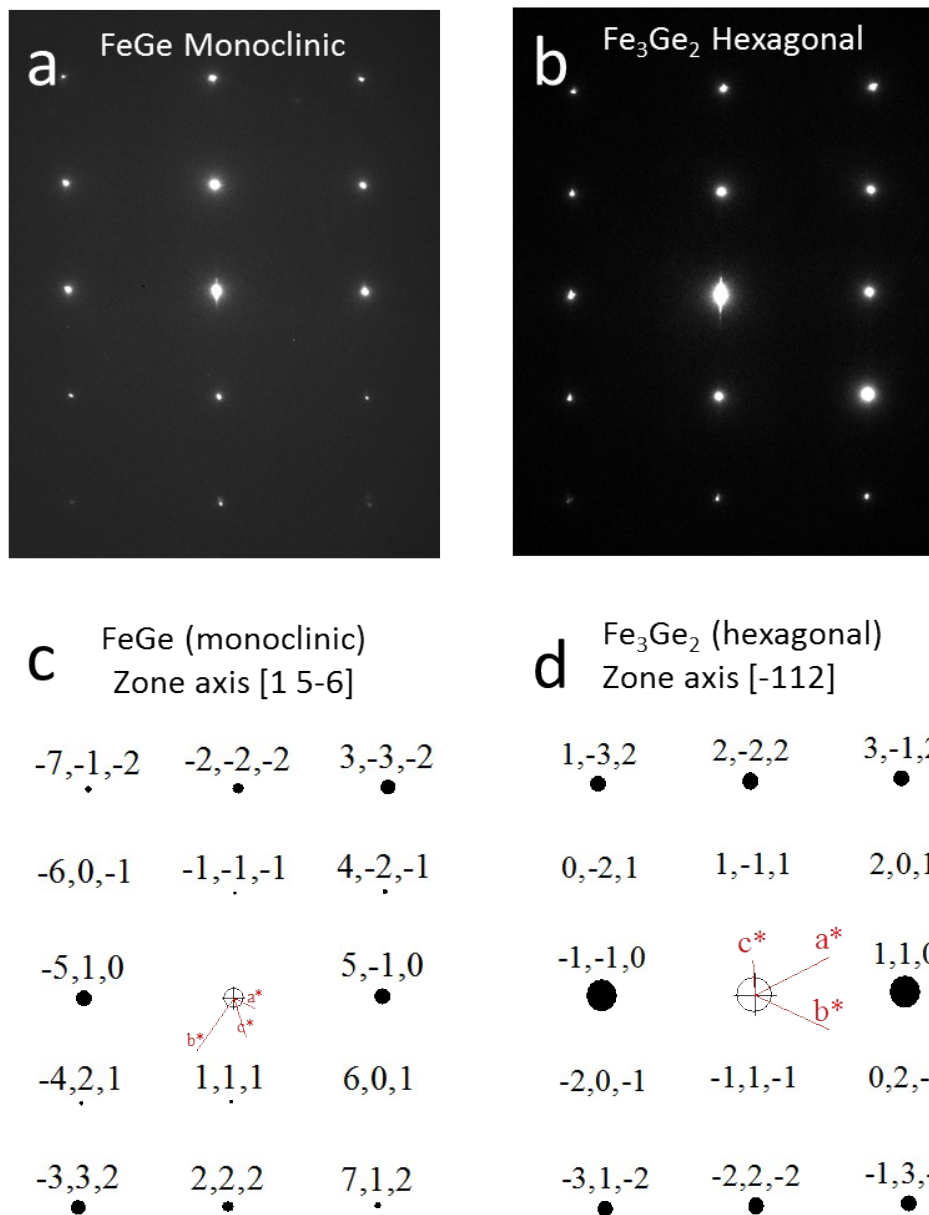

**Figure S8.** Similar electron diffraction pattern of monoclinic and hexagonal phases. SAED of (a) monoclinic FeGe, (b) hexagonal Fe<sub>3</sub>Ge<sub>2</sub>; Simulated reciprocal lattice of (c) monoclinic FeGe, (d) hexagonal Fe<sub>3</sub>Ge<sub>2</sub>.

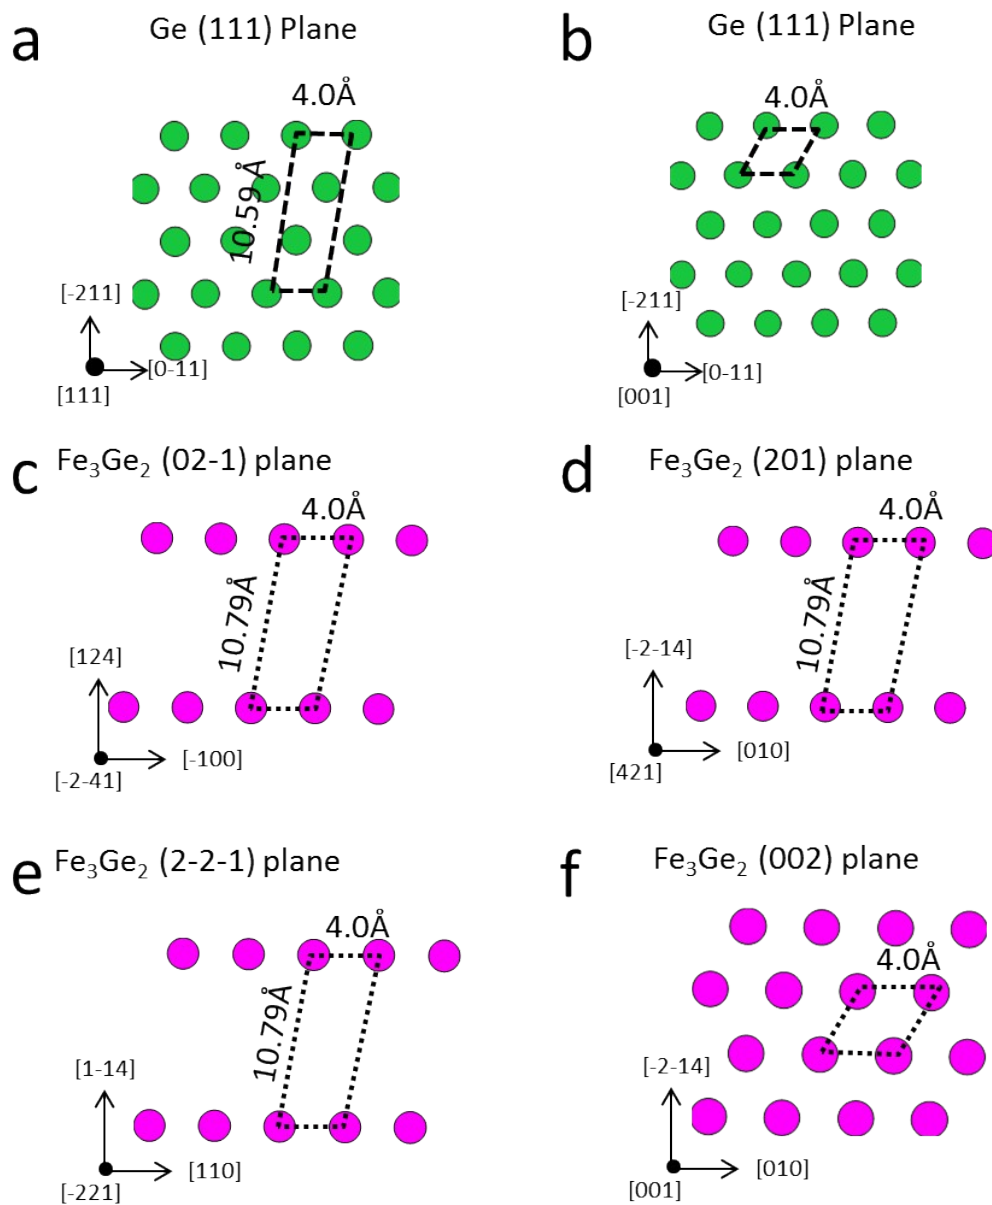

**Figure S9.** Computer simulated atomic arrangement of interface planes of cubic Ge and hexagonal  $\text{Fe}_3\text{Ge}_2$  respectively. (a, b) Ge (111) plane, while (c-f)  $\text{Fe}_3\text{Ge}_2$  (02-1), (201) (2-2-1) and (002) respectively.



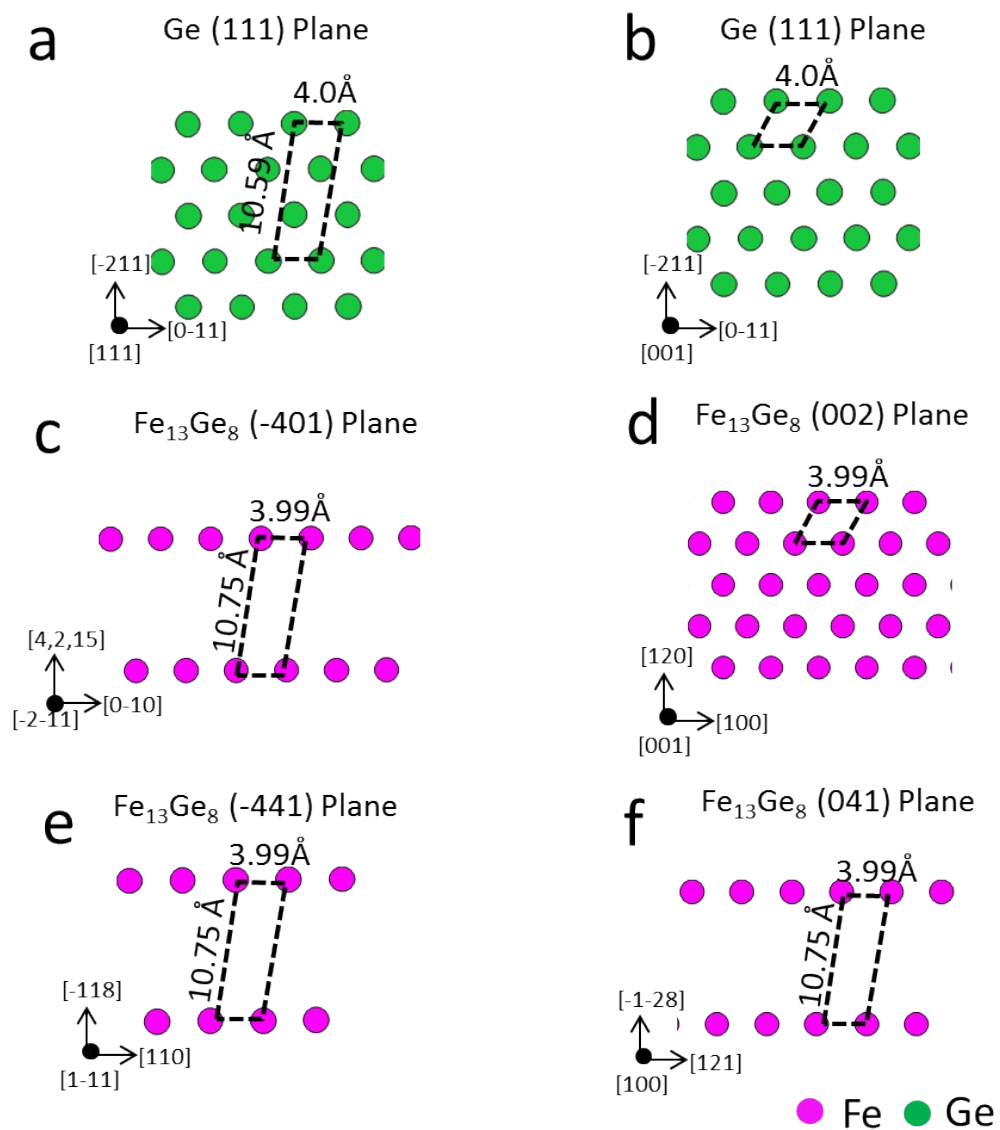

**Figure S10.** Computer simulated atomic arrangement of interface planes of cubic Ge and hexagonal  $\text{Fe}_{13}\text{Ge}_8$  respectively. (a, b) Ge (111) plane, while (c-f)  $\text{Fe}_{13}\text{Ge}_8$  (-401), (002) (-441) and (041) respectively.

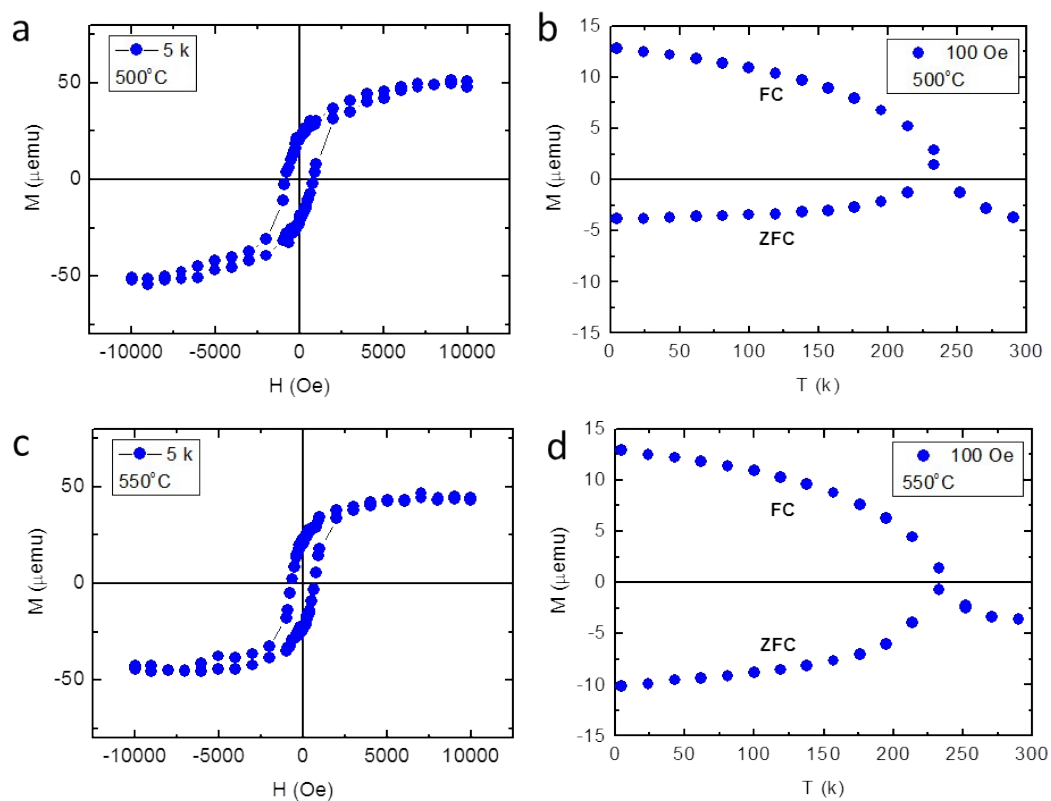

**Figure S11.** The magnetization curves of Fe<sub>x</sub>Ge at 5 K for samples deposited at (a) 500°C and (c) 550°C. The zero-field-cooled (ZFC) and field-cooled (FC) magnetizations at 100 Oe from 5 to 300 K for samples at (b) 500°C and (d) 550°C.
